# Supplementary material
Source: PubMed Central journal article supplement (PMC7925084)
Supplement: JB.00235-20-s0001.pdf [file JB.00235-20-s0001.pdf]

**Supplemental Material.**

1  
2  
3  
4  
5  
6  
7  
8  
9  
10  
11  
12  
13  
14  
15  
16  
17

- Figure S1. The *clpSA-lacZ* fusion is not regulated by Fur or IscR.
- Figure S2. The transient phenotype of the  $Hpx^-$  *clpSA* mutant is statistically robust.
- Figure S3. ClpX and ClpP exhibit independent effects upon cell growth.
- Figure S4. The  $\Delta clpSA \Delta clpX$  mutant remains viable even when 8  $\mu M$   $H_2O_2$  blocks its growth.
- Figure S5.  $Hpx^- \Delta clpSA \Delta clpPX$  cells do not exhibit a significant growth defect in aerobic LB media.
- Figure S6. ClpX and ClpSA are not necessary to recover from an abrupt nutritional downshift.
- Figure S7. The Clp proteins work independently of the Suf cluster-assembly system.
- Figure S8. The protective effect of a *clpX* mutation depends upon Dps in a *recA* strain.
- Figure S9. Unlike Dps, ferritin and bacterioferritin did not affect the level of free iron available to participate in Fenton chemistry.
- Figure S10. Mn does not poison  $Hpx^-$  cells or  $Hpx^+ Clp^-$  cells.
- Table S1. Strains.
- Table S2. Primers.

18

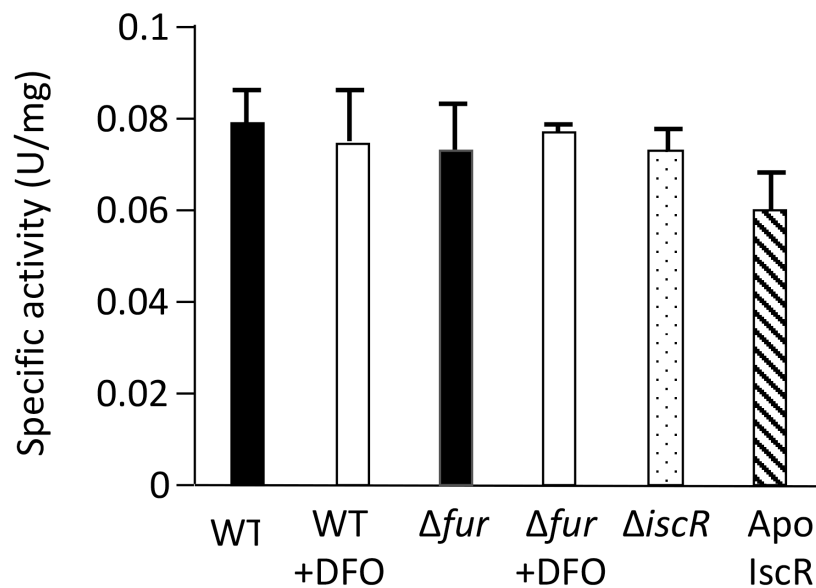

19

20

21

22

23 **Supplementary Figure 1. The *clpSA-lacZ* fusion is not regulated by Fur or IscR.** The cells were  
24 grown aerobically in medium that included histidine and aromatic and branched-chain amino  
25 acids. Where indicated, 100  $\mu$ M of the cell-permeable iron chelator desferrioxamine (DFO) was  
26 supplied to deactivate the Fur:Fe(II) repressor. Apo-IscR strains lack the Fe-S cluster in IscR.  
27 Strains: ASE149, ASE227, ASE242, ASE248.

28

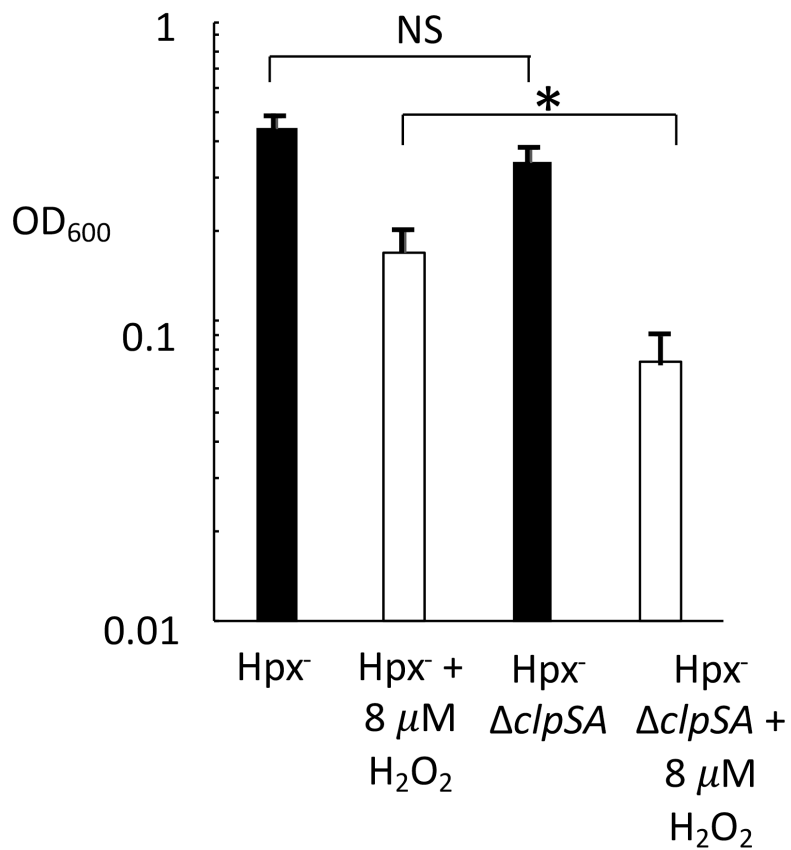

29

30

31 **Supplementary Figure 2. The transient phenotype of the Hpx<sup>-</sup> *clpSA* mutant is statistically**32 **robust.** Anaerobic cultures were diluted into aerobic medium with or without 8 μM H<sub>2</sub>O<sub>2</sub> at

33 time zero. The time points were measured after 12 hours. Strains: LC106, ASE11.

34

35

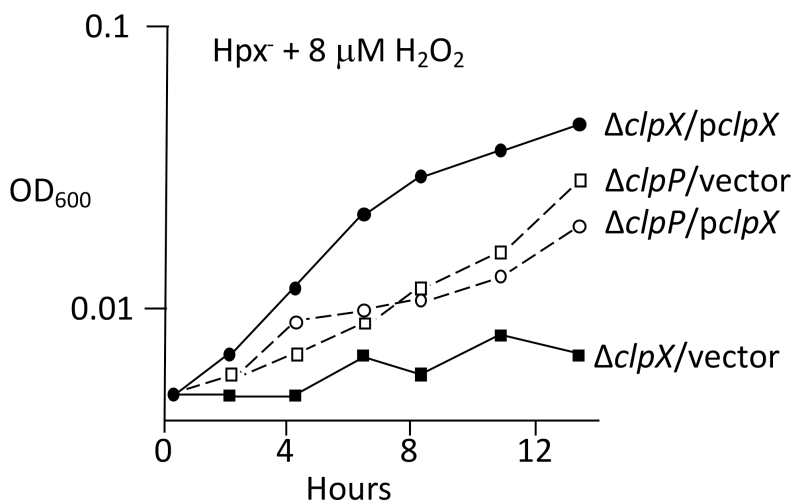

36

37

### 38 **Supplementary Figure 3. ClpX and ClpP exhibit independent effects upon cell growth.**

39 Anaerobic cultures were diluted into aerobic medium containing 8 μM H<sub>2</sub>O<sub>2</sub> at time zero. The  
 40 *clpX* mutant consistently exhibits greater sensitivity to H<sub>2</sub>O<sub>2</sub> than does a *clpP* mutant. A *clpX*  
 41 plasmid complements the *clpX* but not the *clpP* mutation, indicating that the *clpP* phenotype  
 42 does not arise from a polar effect upon *clpX*. Strains: ASE398, ASE400, ASE413, ASE414.

43

44

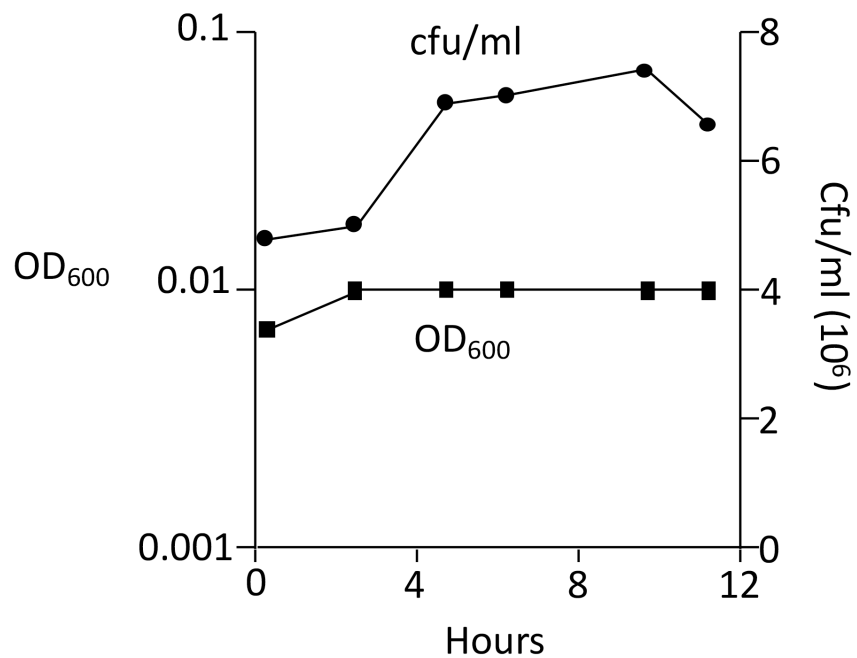

45

46

47 **Supplementary Figure 4. The  $\Delta clpSA \Delta clpX$  mutant remains viable even when 8  $\mu M$  H<sub>2</sub>O<sub>2</sub>**

48 **blocks its growth.** Anaerobic cultures of Hpx<sup>-</sup>  $\Delta clpSA \Delta clpX$  cells (ASE21) were diluted at time  
49 zero into aerobic media containing 8  $\mu M$  H<sub>2</sub>O<sub>2</sub>. At intervals aliquots of the cells were removed  
50 the cells were plated on anoxic medium to determine viability.

51

52

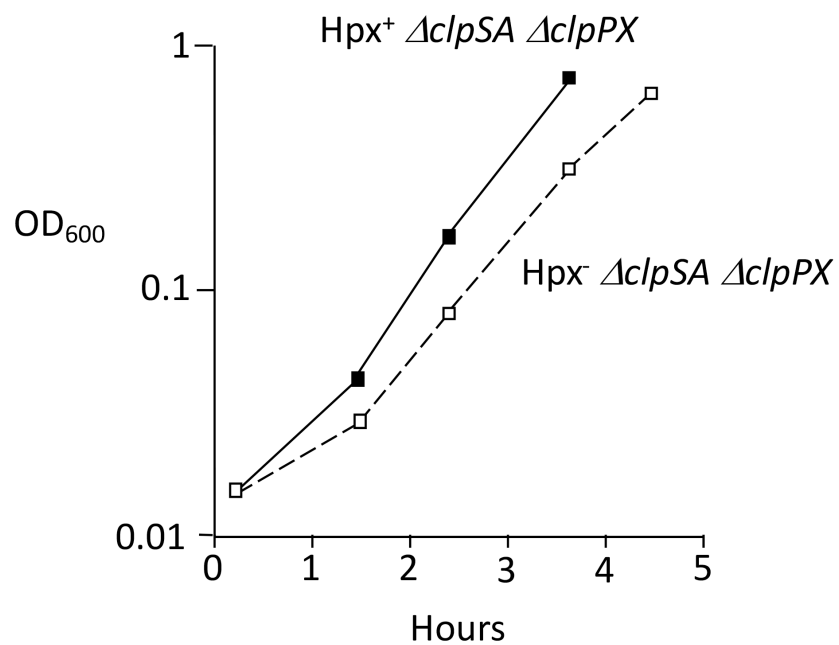

53

54

55 **Supplementary Figure 5. Hpx<sup>-</sup> ΔclpSA ΔclpPX cells do not exhibit a significant growth defect in**

56 **aerobic LB media.** Anaerobic cultures were diluted into aerobic LB at time zero. Strains:

57 ASE125, ASE217.

58

59

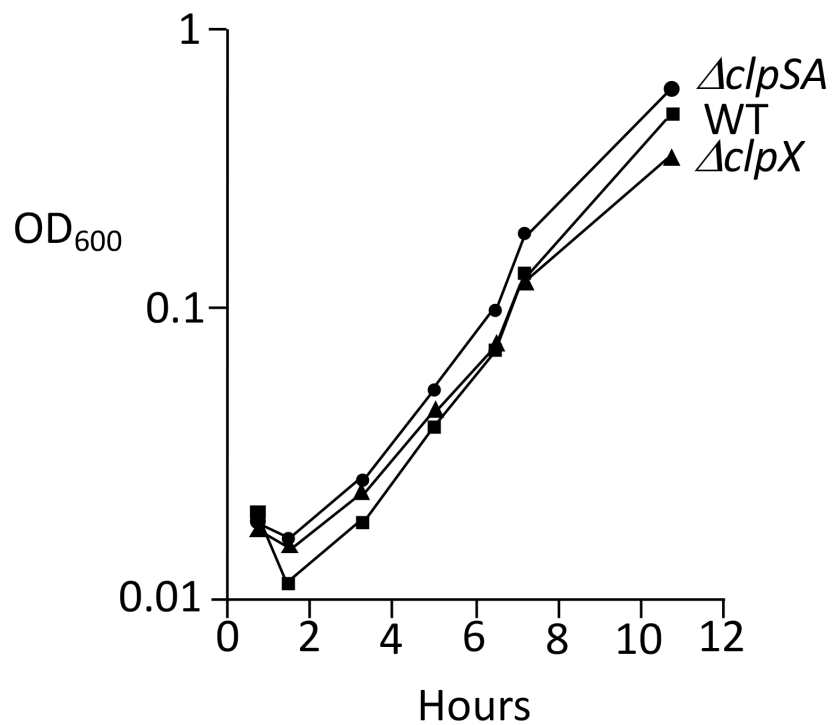

60

61

62 **Supplementary Figure 6. ClpX and ClpSA are not necessary to recover from an abrupt**

63 **nutritional downshift.** The cells were precultured aerobically in LB media to OD 0.1. They were

64 then centrifuged and resuspended at time zero in minimal glucose medium containing Phe, Tyr,

65 Trp, and His. Strains: MG1655, ASE3, ASE9.

66

67

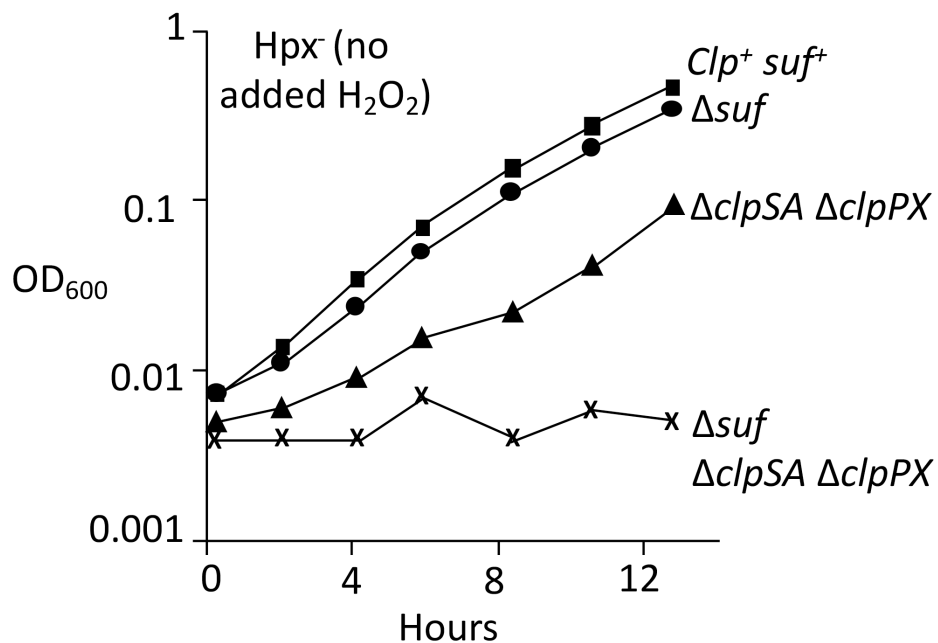

68

69

70 **Supplementary Figure 7. The Clp proteins work independently of the Suf cluster-assembly**71 **system.** Anaerobic cultures of Hpx<sup>-</sup> mutants were diluted at time zero into aerobic medium.72 No additional H<sub>2</sub>O<sub>2</sub> was added, indicating that the phenotypes arise from only the ~ 1 μM H<sub>2</sub>O<sub>2</sub>73 that arises in Hpx<sup>-</sup> cultures. Strains: LC106, SJ1017, ASE213, and ASE300.

74

75



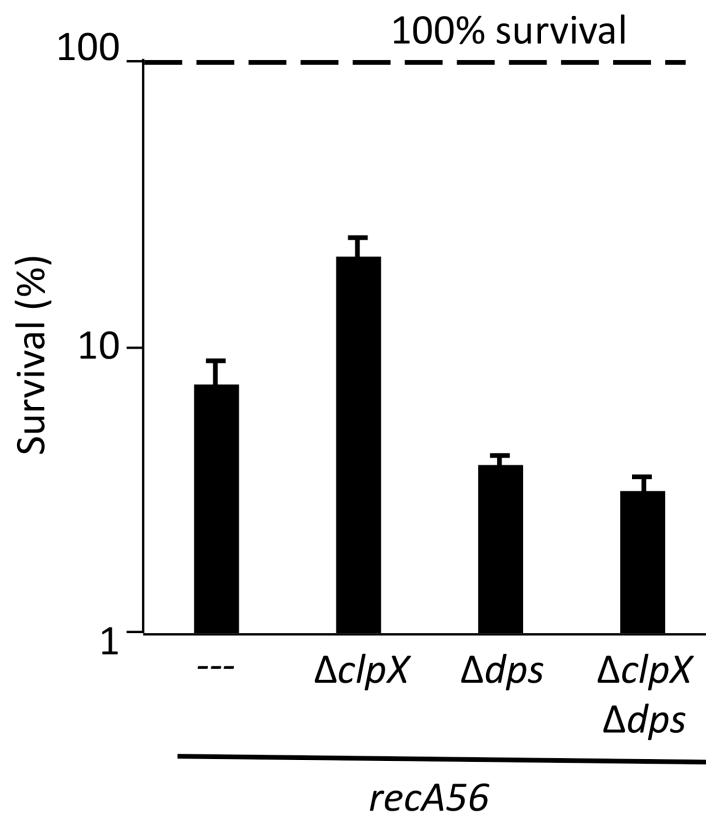

76

77

78 **Supplementary Figure 8. The protective effect of a *clpX* mutation depends upon Dps in a *recA***79 **strain.** Anaerobic cultures were aerated, and 2.5 mM H<sub>2</sub>O<sub>2</sub> was added for 2 minutes. Catalase

80 was then added, and viability was determined by plating on anaerobic LB plates. The use of

81 *recA* strains allowed DNA damage to be perceived without the amplification of Fenton

82 chemistry by cystine addition, as in Fig. 10. Strains: ASE386, ASE388, ASE390.

83

84

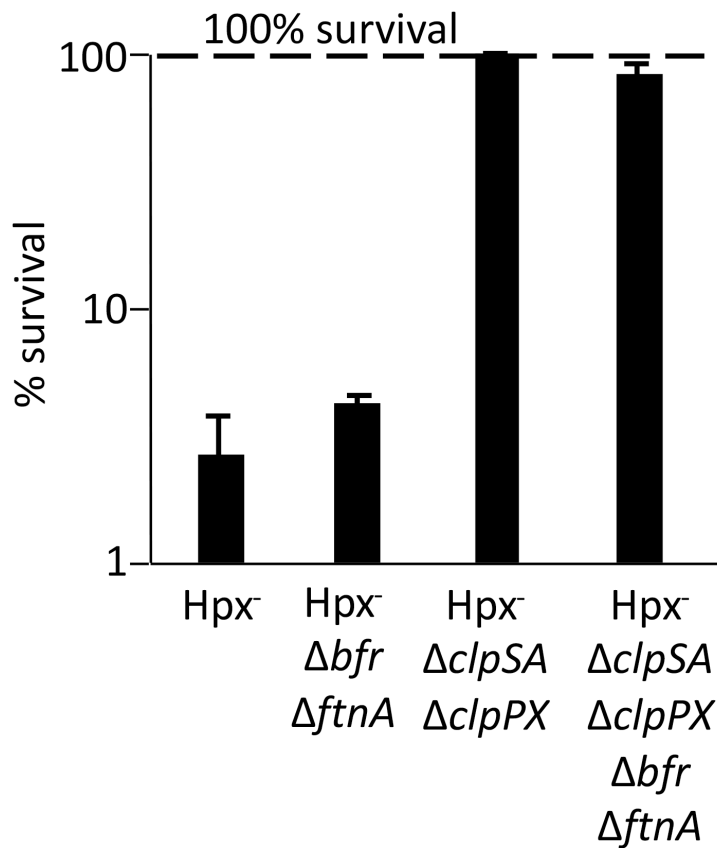

85

86

87 **Supplementary Figure 9. Unlike Dps, ferritin and bacterioferritin did not affect the level of**  
 88 **free iron available to participate in Fenton chemistry.** Anaerobic cells were then aerated for  
 89 two hours. They were diluted in the same medium, incubated for 3 min with 0.5 mM cystine,  
 90 and exposed to 2.5 mM H<sub>2</sub>O<sub>2</sub> for 2 minutes. Catalase was added, and viability was determined  
 91 by plating. Strains: LC106, ASE125, ASE308, ASE310.

92

93

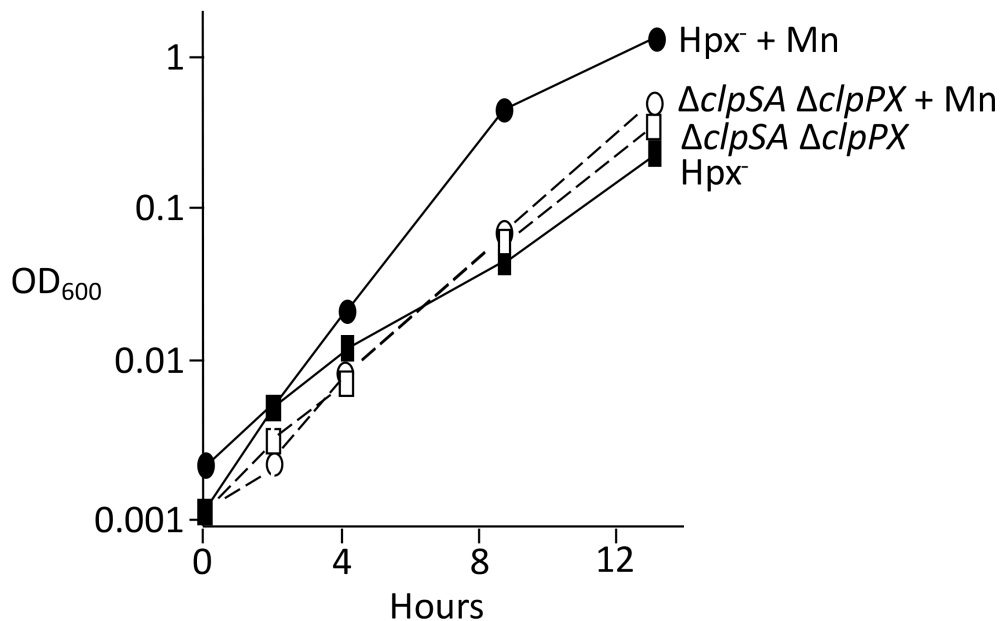

94

95

96 **Supplementary Figure 10. Mn does not poison  $Hpx^-$  cells or  $Hpx^+ Clp^-$  cells.** Anaerobic cultures  
 97 of  $Hpx^-$  cells (LC106) were diluted into aerobic medium at time zero, with or without the  
 98 addition of 4  $\mu M$  manganese. The  $Hpx^+ \Delta clpSA \Delta clpX$  cells (ASE217) were precultured  
 99 aerobically and then diluted in media with or without 4  $\mu M$  manganese.

100

101

102

103  
104  
105**Table S1: Strains**

|        |                                                                                   |
|--------|-----------------------------------------------------------------------------------|
| MG1655 | <i>F</i> wild-type <i>E. coli</i>                                                 |
| LC106  | $\Delta$ ahpF::kan $\Delta$ (katG17::Tn10)1 $\Delta$ (katE12::Tn10)1              |
| AS015  | LC106 with pclpSA                                                                 |
| ASE3   | MG1655 $\Delta$ clpX::cat                                                         |
| ASE7   | LC106 $\Delta$ clpX::cat                                                          |
| ASE9   | MG1655 $\Delta$ clpSA::cat~zjb-1230::Tn10                                         |
| ASE11  | LC106 $\Delta$ clpSA::cat~zjb-1230::Tn10                                          |
| ASE15  | ASE11 with pWKS30                                                                 |
| ASE17  | ASE11 with pclpSA                                                                 |
| ASE21  | LC106 $\Delta$ clpX::cat $\Delta$ clpSA::cat~zjb-1230::Tn10                       |
| ASE36  | LC106 with pclpPX                                                                 |
| ASE38  | ASE7 with pWKS30                                                                  |
| ASE40  | ASE7 with pclpPX                                                                  |
| ASE67  | LC106 $\Delta$ clpP::cat                                                          |
| ASE117 | LC106 $\Delta$ dps::cat $\Delta$ (clpX::cat)                                      |
| ASE119 | LC106 $\Delta$ clpPX::cat                                                         |
| ASE125 | LC106 $\Delta$ clpPX::cat $\Delta$ (clpSA::cat)                                   |
| ASE149 | MG1655 att $\lambda$ ::[pSJ501::clpS'-lacZ']~cat                                  |
| ASE151 | ASE125 with pWKS30                                                                |
| ASE153 | ASE125 with pclpSA                                                                |
| ASE155 | LC106 att $\lambda$ ::[pSJ501::clpS'-lacZ']~cat                                   |
| ASE157 | LC106 $\Delta$ oxyR::spec att $\lambda$ ::[pSJ501::clpS'-lacZ']~cat               |
| ASE173 | MG1655 att $\lambda$ ::[pSJ501::clpS'-lacZ'] with pACYC184                        |
| ASE175 | MG1655 att $\lambda$ ::[pSJ501::clpS'-lacZ'] with pGS058                          |
| ASE197 | MG1655 $\Delta$ clpPX::cat                                                        |
| ASE201 | MG1655 clpX::cat $\Delta$ (clpSA::cat)                                            |
| ASE203 | MG1655 $\Delta$ clpP::cat                                                         |
| ASE207 | LC106 $\Delta$ (clpP::cat) $\Delta$ (clpSA::cat)                                  |
| ASE213 | LC106 $\Delta$ (clpPX::cat) $\Delta$ (clpSA::cat)                                 |
| ASE217 | MG1655 $\Delta$ (clpPX::cat) $\Delta$ (clpSA::cat)                                |
| ASE225 | MG1655 $\Delta$ oxyR::spec att $\lambda$ ::[pSJ501::clpS'-lacZ']                  |
| ASE227 | MG1655 $\Delta$ fur::kan att $\lambda$ ::[pSJ501::clpS'-lacZ']                    |
| ASE242 | MG1655 $\Delta$ iscR1::cat att $\lambda$ ::[pSJ501::clpS'-lacZ']                  |
| ASE248 | MG1655 iscR-(C92A/C92A/C104A)~zfh-3600::kan att $\lambda$ ::[pSJ501::clpS'-lacZ'] |
| ASE252 | MG1655 att $\lambda$ ::[pSJ501::clpPX'-lacZ']~cat                                 |
| ASE254 | LC106 att $\lambda$ ::[pSJ501::clpPX'-lacZ']~cat                                  |
| ASE270 | MG1655 $\Delta$ dps::cat                                                          |
| ASE272 | LC106 $\Delta$ dps::cat $\Delta$ (clpPX::cat) $\Delta$ (clpSA::cat)               |
| ASE282 | LC106 $\Delta$ dps::cat                                                           |

|        |                                                                                 |
|--------|---------------------------------------------------------------------------------|
| ASE296 | LC106 $\Delta bfr::cat$                                                         |
| ASE298 | LC106 $\Delta bfr::cat \Delta(clpPX::cat) \Delta(clpSA::cat)$                   |
| SJ1017 | LC106 $\Delta sufBCDSE1::cat$                                                   |
| ASE300 | LC106 $\Delta sufBCDSE1::cat \Delta(clpPX::cat) \Delta(clpSA::cat)$             |
| ASE308 | LC106 $\Delta ftnA::cat \Delta(bfr::cat)$                                       |
| ASE310 | LC106 $\Delta ftnA::cat \Delta(bfr::cat) \Delta(clpPX::cat) \Delta(clpSA::cat)$ |
| ASE386 | MG1655 $\Delta clpX::cat recA56-srlC300::Tn10$                                  |
| ASE388 | MG1655 $\Delta dps::cat recA56-srlC300::Tn10$                                   |
| ASE390 | MG1655 $\Delta clpX::cat \Delta(dps::cat) recA56-srlC300::Tn10$                 |
| ASE394 | LC106 with pCKR101                                                              |
| ASE396 | LC106 with p <i>clpX</i>                                                        |
| ASE398 | ASE7 with pCKR101                                                               |
| ASE400 | ASE7 with p <i>clpX</i>                                                         |
| ASE402 | ASE119 with pCKR101                                                             |
| ASE404 | ASE119 with p <i>clpX</i>                                                       |
| ASE406 | ASE207 with pCKR101                                                             |
| ASE408 | ASE207 with p <i>clpX</i>                                                       |
| ASE412 | LC106 $iucC::lacZ \Delta clpX::cat$                                             |
| ASE413 | ASE67 with pCKR101                                                              |
| ASE414 | ASE67 with p <i>clpX</i>                                                        |
| ASE425 | MG1655 pColV( <i>iucC::lacZ</i> ) $\Delta clpX::cat$                            |
|        |                                                                                 |

106

107 MG1655 (1) is a wild-type strain that was obtained from the *E. coli* Genetic Stock Center. LC106  
108 (2) is an Hpx<sup>-</sup> derivative of it. The plasmids pWKS30 (3) and pACYC184 and pGS058 are  
109 described (4). Derivative strains listed above were constructed using alleles that were provided  
110 by colleagues. The  $\Delta dps::cat$  and  $\Delta oxyR::spec$  (5) alleles were obtained in strains from Stephen  
111 Finkel and Gigi Storz, respectively. The  $\Delta fur::kan$  allele was transduced from EM1256 (6). The  
112  $\Delta iscR1::cat$  allele was generated in (7). The *iscR*-(C92A/C92A/C104A)~*zfh-3600::kan* allele was  
113 obtained in PK7887 (8); the  $\Delta sufBCDSE1::cat$  allele (7) was made in our lab. The pCKR101  
114 plasmid (7) was provided by Jeff Gardner. The *recA56* allele was reported (9). The  
115 pColV(*iucC::lacZ*) plasmid (10) was obtained from Joe Niellands.

116

117

Table S2: Primers

|                       |                                                                                                                                           |
|-----------------------|-------------------------------------------------------------------------------------------------------------------------------------------|
| <i>clpSA</i> deletion | 5'-GGCGTTCTGCCGATAACCGTAACCGAAGATGATAACTGACATGTAGGCTGGAGCTGCTTCG-3'<br>5'-TTCGAGATTACGGACTTGACCAACCTACCTAACAATCAGACATATGAATATCCTCCTTAG-3' |
| <i>clpX</i> deletion  | 5'-GTGTGCGGCACAAAGAACAAGAAGAGGTTTTGACCCATGTGTAGGCTGGAGCTGCTTCG-3'<br>5'-CCCTTTTTGGTTAACTAATTGTATGGGAATGGTTAATTACATATGAATATCCTCCTTAG-3'    |
| <i>clpP</i> deletion  | 5'-CGGTACAGCAGGTTTTTTCAATTTTATCCAGGAGACGGAATGTAGGCTGGAGCTGCTTCG-3'<br>5'-ATGAAGCGCCATAAGTTCATTCATGCGCCCTTTAACTTTCCATATGAATATCCTCCTTAG-3'  |
| <i>suf</i> deletion   | 5'-CTGTTATACGCTGAAAGCGATGAAGTGAGGTAATCGATGTGTAGGCTGGAGCTGCTTCG-3'<br>5'-CAATGTGAGCCAACCGGATGAAAGCTGTCCTTTTAGTTTACATATGAATATCCTCCTTAG-3'   |
| <i>dps</i> deletion   | 5'-TAATTACTGGGACATAACATCAAGAGGATATGAAATTATGTGTAGGCTGGAGCTGCTTCG-3'<br>5'-TATCGGGTACTAAAGTTCTGCACCATCAGCGATGGATTTACATATGAATATCCTCCTTAG-3'  |
| <i>bfr</i> deletion   | 5'-TCTACTCTTCAAAGAGTGGAAGCGAAGGAGTCAAAAATGTGTAGGCTGGAGCTGCTTCG-3'<br>5'-TCTTATTAACCGGGAGGGTTCTCCCTCCCGACACGGCTCACATATGAATATCCTCCTTAG-3'   |
| <i>ftnA</i> deletion  | 5'-GCCACAGCAACAAATATAACCTTTGTGGAGCACTATCATGTGTAGGCTGGAGCTGCTTCG-3'<br>5'-TTTGAACGGCGGCAGTAAACCTGCCGCCGAGAGCATTACATATGAATATCCTCCTTAG-3'    |
| <i>clpSA::lacZ</i>    | 5'-AAGATCGTCGGTACCCTGGCATTTCCTTTAGGA-3'<br>5'-GCGTAGCGGAATTCCATTGTCAGTTATCATCTTC-3'                                                       |
| <i>clpPX::lacZ</i>    | 5'-ACGTAAGTGTGACGCGGTGTTAGCGTAACAACAA-3'<br>5'-ATGCTAGCTGGTACCCATGGGTCAAACCTCTTC-3'                                                       |
| Cloning <i>clpPX</i>  | 5'-TGACAGGGATCCAAAGCCTCTTTCGGTGTAGCGT-3'<br>5'-ATACGTATCTGCAGGATGTTTCCCCACATTCAA-3'                                                       |
| Cloning <i>clpSA</i>  | 5'-TAATATAATGGATCCATAAACCGGGTTCAGAGAGG-3'<br>5'-ATAATATAACTGCAGACCTCCTCCACCCCATAAAC-3'                                                    |
| Cloning <i>clpX</i>   | 5'-ACGTACGTGGTACCCAAAGAAGAGGTTTTGACCCATGACAGATAAACGC-3'<br>5'-AGTTCACTTGTCGACGGTTAATTATCACCAGATGCCTGTTGC-3'                               |

118

119

120

**References for supplementary material.**

- 121  
122
- 123 1. Neidhardt FC (ed). 1996. *Escherichia coli* and *Salmonella*. ASM Press, Washington D C.
  - 124 2. Seaver LC, Imlay JA. 2001. Alkyl hydroperoxide reductase is the primary scavenger of  
125 endogenous hydrogen peroxide in *Escherichia coli*. J Bacteriol 183:7173-7181.
  - 126 3. Wang RF, Kushner SR. 1991. Construction of versatile low-copy-number vectors for  
127 cloning, sequencing and gene expression in *Escherichia coli*. Gene 100:195-199.
  - 128 4. Kullik I, Stevens J, Toledano MB, Storz G. 1995. Mutational analysis of the redox-  
129 sensitive transcriptional regulator OxyR: regions important for DNA binding and  
130 multimerization. J Bacteriol 177:1285-91.
  - 131 5. Park S, You X, Imlay JA. 2005. Substantial DNA damage from submicromolar intracellular  
132 hydrogen peroxide detected in Hpx<sup>-</sup> mutants of *Escherichia coli*. Proc Natl Acad Sci USA  
133 102:9317-9322.
  - 134 6. Masse E, Gottesman S. 2002. A small RNA regulates the expression of genes involved in  
135 iron metabolism in *Escherichia coli*. Proc Natl Acad Sci USA 99:4620-4625.
  - 136 7. Jang S, Imlay JA. 2010. Hydrogen peroxide inactivates the *Escherichia coli* Isc iron-  
137 sulphur assembly system, and OxyR induces the Suf system to compensate. Mol  
138 Microbiol 78:1448-67.
  - 139 8. Nesbit AD, Giel JL, Rose JC, Kiley PJ. 2009. Sequence-specific binding to a subset of IscR-  
140 regulated promoters does not require IscR Fe-S cluster ligation. J Mol Biol 387:28-41.
  - 141 9. Imlay JA, Linn S. 1986. Bimodal pattern of killing of DNA-repair-defective or anoxically  
142 grown *Escherichia coli* by hydrogen peroxide. JBact 166:519-527.
  - 143 10. Bagg A, Neilands JB. 1985. Mapping of a mutation affecting regulation of iron uptake  
144 systems in *Escherichia coli* K-12. J Bacteriol 161:450-453.
- 145  
146
